# Supplementary material for: Mast cells promote atherosclerosis by releasing proinflammatory cytokines
Source: Springer Nature journal article supplement (doi:10.1038/nm1601), 2007-06-01
Supplement: nm1601-S3.pdf [file nm1601-S3.pdf]

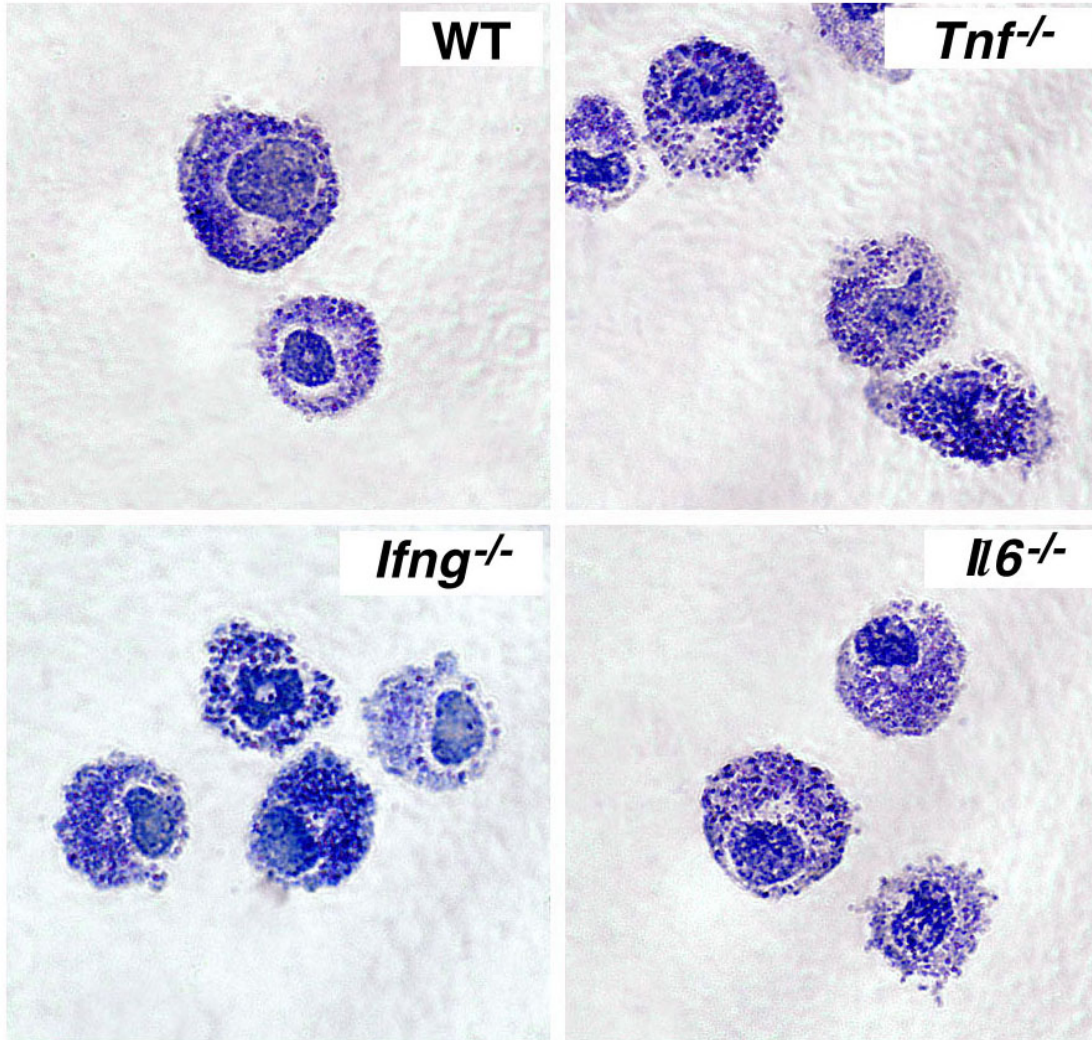

**Supplementary Fig. 3.** Bone marrow-derived mast cell (BMMC) morphology. Bone marrow cells from wild-type (WT), *Tnf*<sup>-/-</sup>, *Il6*<sup>-/-</sup>, and *Ifng*<sup>-/-</sup> mice were differentiated in the presence of IL-3 and stem cell factor for 5 weeks (Wolters PJ et al. Clin Exp Allergy 2005;35:82-88). BMMC were then stained with toluidine blue. BMMC from all four types of mice show the similar granular morphology.
